# Supplementary material for: Benzothiazole—An Antifungal Compound Derived from Medicinal Mushroom Ganoderma lucidum against Mango Anthracnose Pathogen Colletotrichum gloeosporioides (Penz and (Sacc.))
Source: MDPI journal article supplement (doi:10.3390/molecules28062476), 2023-03-08

**Figure S1. Characterization of antimicrobial compounds from Ethyl acetate solvent fractions from fruiting body of *G. lucidum***

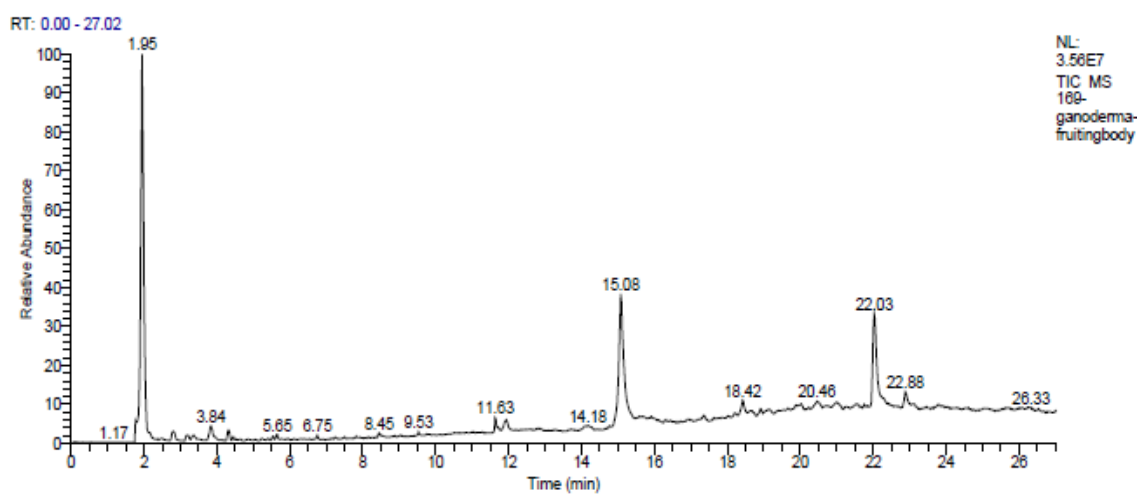

Supplement: s1 [file s1]
